# Supplementary material
Source: HighWire-hosted journal article supplement (https://bmjopen.bmj.com/content/8/3/e018479)
Supplement: inline-supplementary-material-1 [file inline-supplementary-material-1.pdf]

**Appendix.** Specification of the codes used to define our variables

| <b>Variable</b>                                     | <b>Definition</b>                                                                                                                      |
|-----------------------------------------------------|----------------------------------------------------------------------------------------------------------------------------------------|
| <b>Exposure (mode of delivery)</b>                  | <b>Nordic Medico-Statistical Committee code</b>                                                                                        |
| <i>Intended caesarean delivery</i>                  | KMCA10B, KMCA10D                                                                                                                       |
| Planned CD prelabor                                 | KMCA10B                                                                                                                                |
| Planned CD in labour                                | KMCA10D                                                                                                                                |
| <i>Intended VD</i>                                  | KMCA10A, KMCA10E, KMAE00, KMAE03, KMAE96, KMAF00, KMAF10 and no operation code related to birth                                        |
| Emergency CD prelabor                               | KMCA10A                                                                                                                                |
| Emergency CD in labour                              | KMCA10E                                                                                                                                |
| Operative VD                                        | KMAE00, KMAE03, KMAE96, KMAF00, KMAF10 and no concurrent KMCA-code.                                                                    |
| Spontaneous VD                                      | No operation code related to delivery                                                                                                  |
| <b>Outcome (postpartum urinary tract infection)</b> | <b>ICD10-code</b>                                                                                                                      |
| <i>UTI based on hospital discharge diagnoses</i>    |                                                                                                                                        |
| Upper UTI                                           | DN10, DN12                                                                                                                             |
| Lower UTI                                           | DN30                                                                                                                                   |
| <i>UTI based on antibiotics redemption</i>          | <b>ATC code</b>                                                                                                                        |
| UTI specific antibiotics                            | Sulfamethizole (J01EB02), Mecillinam (J01CA11), Nitrofurantoin (J01XE01), Trimethoprim (J01EE01), Amoxicillin (J01CA04), Pivampicillin |

|                                           |                                                                                                                                                                    |
|-------------------------------------------|--------------------------------------------------------------------------------------------------------------------------------------------------------------------|
|                                           | (J01CA02), Ampicillin (J01CA01) and no concurrent Metronidazole (P01AB01)                                                                                          |
| Antibiotics used for sensitivity analysis | Dicloxacillin (J01CF01), Benzylpenicillin (J01CE01) or Metronidazole (P01AB01)                                                                                     |
| <b>Other covariates</b>                   | <b>ICD10-code</b>                                                                                                                                                  |
| <i>GDM</i>                                | D0244                                                                                                                                                              |
| <i>Infection during pregnancy</i>         | D023, D0411, D0752, D0753, D098, DG0, DJ00, DJ01, DJ02, DJ03, DJ04, DJ05, DJ06, DJ13, DJ14, DJ15, DJ16, DJ18, DJ20, DJ21, DJ22, DK35, DK36, DK37, DN30, DN10, DN12 |
| <i>PPROM</i>                              | D042                                                                                                                                                               |
| <i>Preeclampsia</i>                       | D0150, D0151, D0152, D0159, D0141, D0142, D0140, D0149, D013, D016, D0169, D0139                                                                                   |

**Abbreviations:** *ATC*, anatomical therapeutic chemicals according to WHO; *CD*, caesarean delivery; *GDM*, gestational diabetes mellitus; *ICD10*, the international classification of diseases, 10<sup>th</sup> revision, since 1994; *PPROM*, preterm prelabor rupture of membranes; *UTI*, urinary tract infection; *VD*, vaginal delivery
