# Supplementary material
Source: HighWire-hosted journal article supplement (https://bmjopen.bmj.com/content/8/3/e018479)
Supplement: inline-supplementary-material-3 [file inline-supplementary-material-3.pdf]

SUPPLEMENTARY TABLE 2

Risk of postpartum urinary tract infection within the first 30 days postpartum by actual mode of delivery

| <i>Models</i>                                 | <i>Crude</i>       | <i>Adjusted 1<sup>1</sup></i> | <i>Adjusted 2<sup>2</sup></i> |
|-----------------------------------------------|--------------------|-------------------------------|-------------------------------|
|                                               | <i>OR (95% CI)</i> | <i>Adjusted OR (95% CI)</i>   | <i>Adjusted OR (95% CI)</i>   |
| <i>Actual mode of delivery</i>                |                    |                               |                               |
| <i>Spontaneous VD<sup>3</sup></i>             | 1.0 (ref)          | 1.0 (ref)                     | 1.0 (ref)                     |
| <i>Operative VD<sup>3</sup></i>               | 1.68 (1.60–1.77)   | 1.47 (1.38–1.56)              | 1.47 (1.38–1.56)              |
| <i>Planned CD prelabor<sup>3</sup></i>        | 1.51 (1.43– 1.58)  | 1.40 (1.32–1.49)              | 1.50 (1.39–1.62)              |
| <i>Planned CD in labour<sup>3</sup></i>       | 1.68 (1.47–1.91)   | 1.57 (1.35–1.84)              | 1.73 (1.44–2.08)              |
| <i>Emergency CD prelabor<sup>3</sup></i>      | 1.37 (1.26–1.49)   | 1.33 (1.20–1.47)              | 1.41 (1.26–1.58)              |
| <i>Emergency CD in labour<sup>3</sup></i>     | 1.79 (1.70–1.88)   | 1.53 (1.44–1.61)              | 1.61 (1.52–1.72)              |
| <i>Covariates</i>                             |                    |                               |                               |
| <i>Age at delivery</i>                        | -                  | 0.99 (0.99–1.00)              | 0.99 (0.99–1.00)              |
| <i>Smoking</i>                                | -                  | 0.99 (0.94–1.04)              | 0.99 (0.94–1.04)              |
| <i>BMI <math>\geq</math> 25</i>               | -                  | 1.12 (1.08–1.17)              | 1.12 (1.08–1.67)              |
| <i>Educational level</i>                      | -                  |                               |                               |
| <i>Elementary school/high school</i>          | -                  | Ref                           | Ref                           |
| <i>Short education/skilled worker</i>         | -                  | 0.94 (0.90–0.99)              | 0.94 (0.90–0.99)              |
| <i>Medium/long education</i>                  | -                  | 0.92 (0.88–0.96)              | 0.92 (0.88–0.96)              |
| <i>GDM<sup>3</sup></i>                        | -                  | 1.05 (0.94–1.17)              | 1.05 (0.94–1.18)              |
| <i>Infection during pregnancy<sup>3</sup></i> | -                  | 2.11 (2.00–2.34)              | 2.11 (2.00–2.23)              |
| <i>Birth weight&lt;2500g</i>                  | -                  | 0.80 (0.75–0.91)              | 0.79 (0.71–0.89)              |
| <i>Birth &lt; 37 weeks gestation</i>          | -                  | 0.83 (0.75–0.91)              | 0.83 (0.75–0.91)              |
| <i>PPROM<sup>3</sup></i>                      | -                  | 1.07 (1.00–1.15)              | 1.07 (1.00–1.15)              |
| <i>Preeclampsia<sup>3</sup></i>               | -                  | 1.30 (1.21–1.41)              | 1.30 (1.20–1.40)              |

|                                                                 |   |                  |                  |
|-----------------------------------------------------------------|---|------------------|------------------|
| <i>Parous</i>                                                   | - | 0.75 (0.72–0.79) | 0.76 (0.73–0.80) |
| <i>Previous CD</i>                                              | - | 1.37 (1.29–1.45) | 1.64 (1.50–1.78) |
| <i>Interaction of previous CD and intended mode of delivery</i> |   |                  |                  |
| <i>Operative VD<sup>3</sup></i>                                 | - | -                | 1.02 (0.83–1.24) |
| <i>Planned CD prelabor<sup>3</sup></i>                          | - | -                | 0.76 (0.66–0.86) |
| <i>Planned CD in labour<sup>3</sup></i>                         | - | -                | 0.63 (0.44–0.90) |
| <i>Emergency CD prelabor<sup>3</sup></i>                        | - | -                | 0.71 (0.57–0.89) |
| <i>Emergency CD in labour<sup>3</sup></i>                       | - | -                | 0.65 (0.55–0.76) |

---

*BMI*, Body Mass Index, *CD*, caesarean delivery; *GDM*, gestational diabetes mellitus; *PPROM*, preterm prelabor rupture of membranes; *VD*, vaginal delivery.

1: Adjusted for age at delivery, smoking, BMI, education level, GDM, infection during pregnancy, low birth weight, preterm birth, PPRM, preeclampsia, parity, previous CD

2: Adjusted for covariates in model 1 and interaction between previous CD and mode of delivery.

3: See Appendix
